# Supplementary material
Source: Royal Society of Chemistry journal article supplement (doi:10.1039/d6dt00016a)
Supplement: d6dt00016a2.pdf [file d6dt00016a2.pdf]

## Supporting information

### **Synergistic effect of electrolyte and intercalation engineering: comprehensive enhancement of electrochemical performance in a mixed proton–electron conducting layered vanadate cathode for aqueous zinc-ion batteries**

Cheng Wang,<sup>a</sup> Ziqian Zeng,<sup>a</sup> Kefan Wang,<sup>a</sup> Dingjie Ma,<sup>a</sup> Yang Zou,<sup>b</sup> Qiao Qiao,<sup>b</sup>  
Zhiyuan Yao,<sup>a,b,\*</sup> and Xiaoming Ren<sup>b,c\*</sup>

<sup>a</sup> School of Physical and Mathematical Science, Nanjing Tech University, Nanjing  
211816, P. R. China

<sup>b</sup> State Key Laboratory of Materials-Oriented Chemical Engineering and School of  
Chemistry and Molecular Engineering, Nanjing Tech University, Nanjing 211816, P.  
R. China

<sup>c</sup> State Key Laboratory of Coordination Chemistry, Nanjing University, Nanjing  
210023, P. R. China

Email: [zyyao@njtech.edu.cn](mailto:zyyao@njtech.edu.cn) (ZYY)

[xmren@njtech.edu.cn](mailto:xmren@njtech.edu.cn) (XMR)

## Contents

Fig. S1 (a) The situation of the  $C_4N_2-VO$  sample with water for three days. (b) TG plot of  $C_4N_2-VO$  sample in 300–1073 K.

Fig. S2 Experimental and fitted impedance spectra of  $C_4N_2-VO$  at the selected temperatures (Inset: the equivalent circuit).

Fig. S3 Experimental and fitted impedance spectra of  $C_4N_2-VO$  at the selected temperatures (Inset: the equivalent circuit).

Fig. S4 Plots of  $\sigma_{total}$  vs.  $T$  of  $C_4N_2-VO$ .

Fig. S5 (a) CV curves for the first ten cycles in the 0%-PEG electrolyte. (b) Charge-discharge curves at  $0.2 \text{ A g}^{-1}$  of  $C_4N_2-VO$  in the 0%-PEG electrolyte.

Fig. S6 Ragone plot of  $C_4N_2-VO$  cathode in the 20%-PEG electrolyte.

Fig. S7 (a) CV curves at different scan rates under 0%-PEG electrolyte. (b)  $\text{Log}(i)$  vs.  $\text{log}(\nu)$  plot of four peaks in CV curves in the 0%-PEG electrolyte.

Table S1 The proton conductivity performance of common proton-conducting materials.

Table S2 The proton conductivity performance of water-assisted vanadium-based proton conductors.

Table S3 Comparison of the electrochemical performance of vanadium oxide-based cathode materials for AZIBs.

(a)

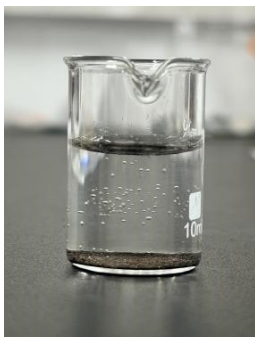

(b)

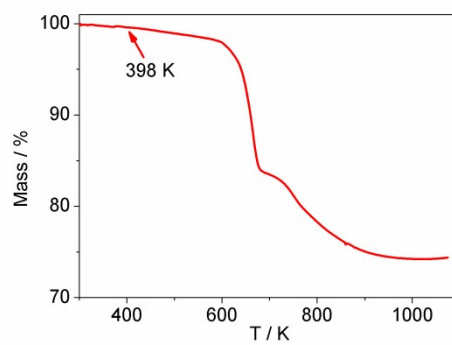

Fig. S1 (a) The situation of the  $C_4N_2-VO$  sample with water for three days. (b) TG plot of  $C_4N_2-VO$  sample in 300–1073 K.

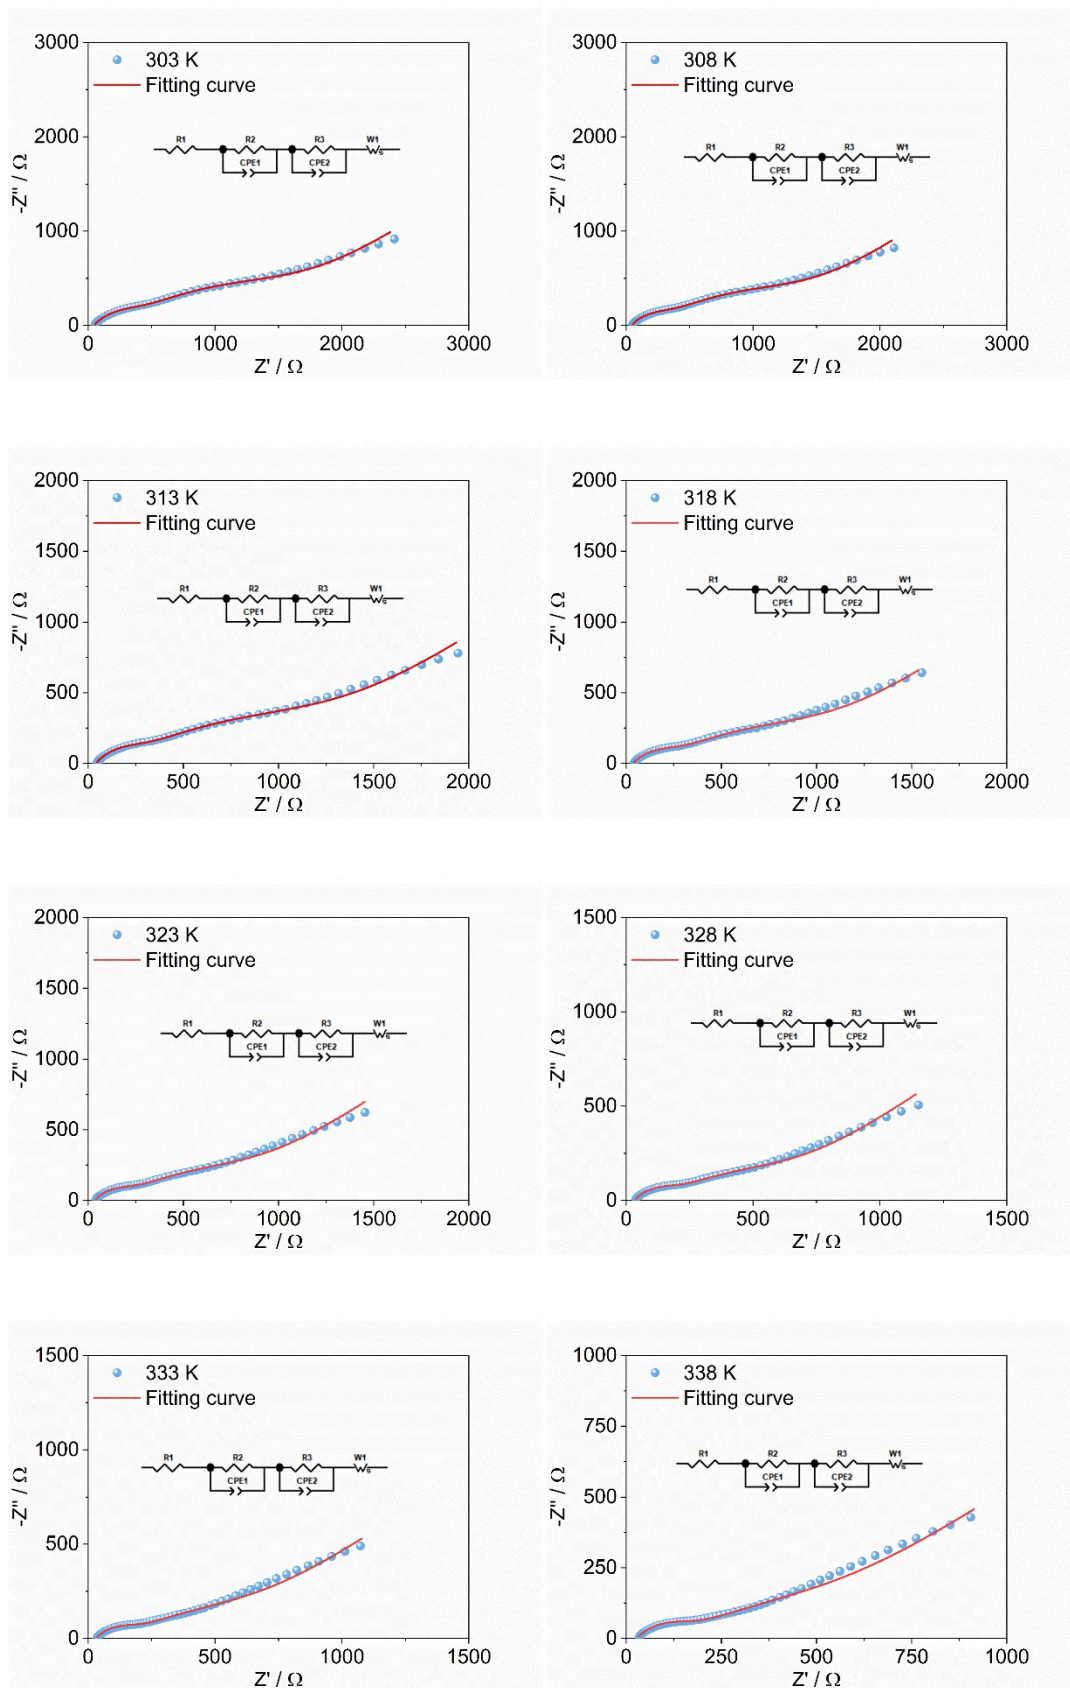

Fig. S2 Experimental and fitted impedance spectra of  $C_4N_2-VO$  at the selected temperatures (Inset: the equivalent circuit).

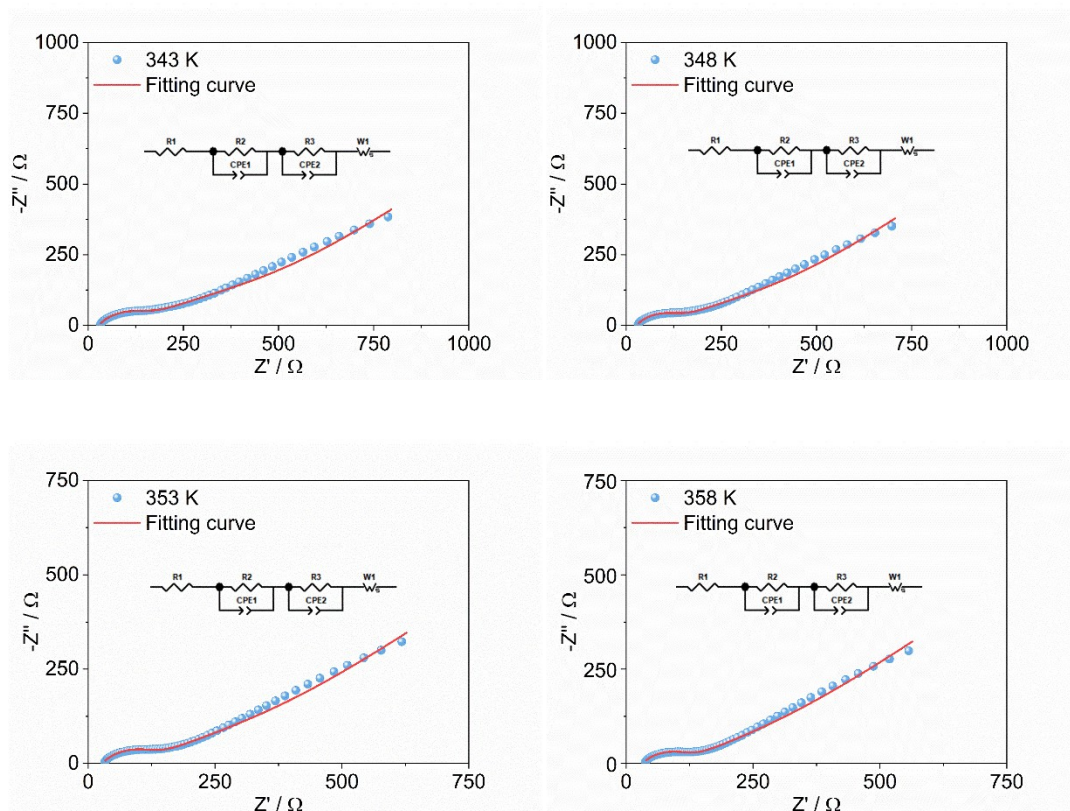

Fig. S3 Experimental and fitted impedance spectra of  $C_4N_2-VO$  at the selected temperatures (Inset: the equivalent circuit).

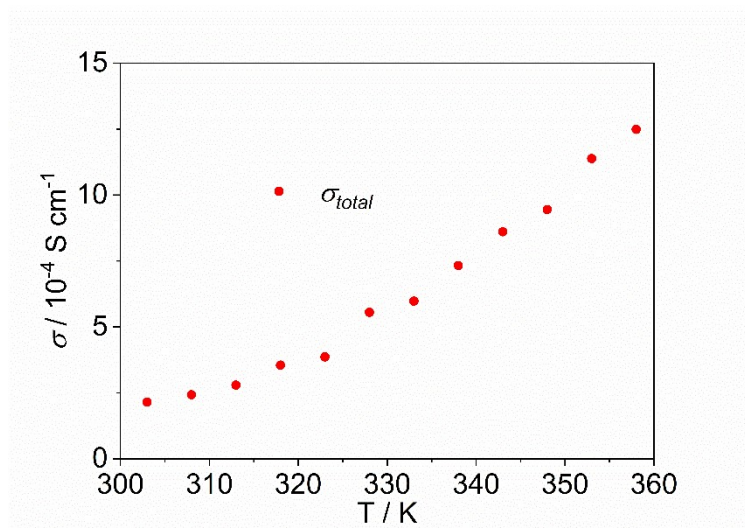

Fig. S4 Plots of  $\sigma_{total}$  vs.  $T$  of  $C_4N_2-VO$ .

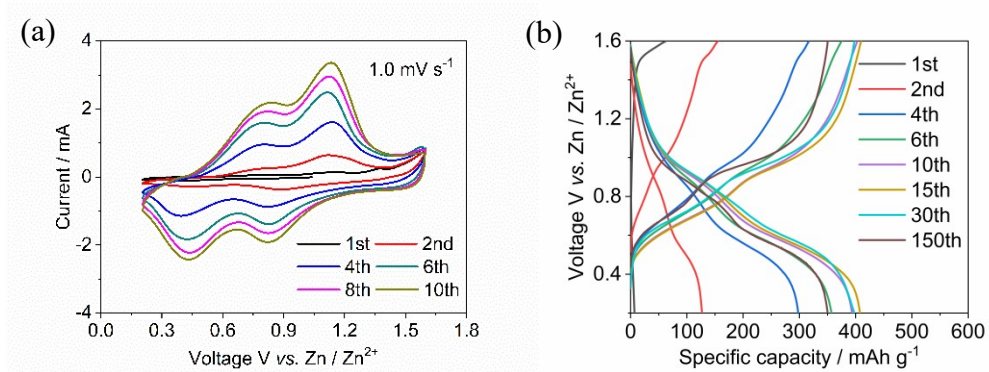

Fig. S5 (a) CV curves for the first ten cycles in the 0%-PEG electrolyte. (b) Charge-discharge curves at  $0.2 \text{ A g}^{-1}$  of  $\text{C}_4\text{N}_2\text{-VO}$  in the 0%-PEG electrolyte.

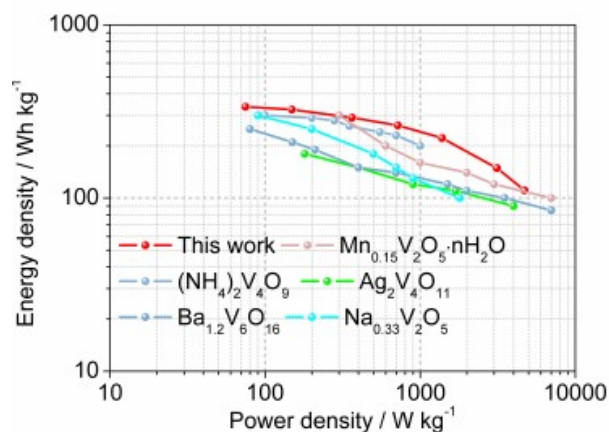

Fig. S6 Ragone plot of  $\text{C}_4\text{N}_2\text{-VO}$  cathode in the 20%-PEG electrolyte.

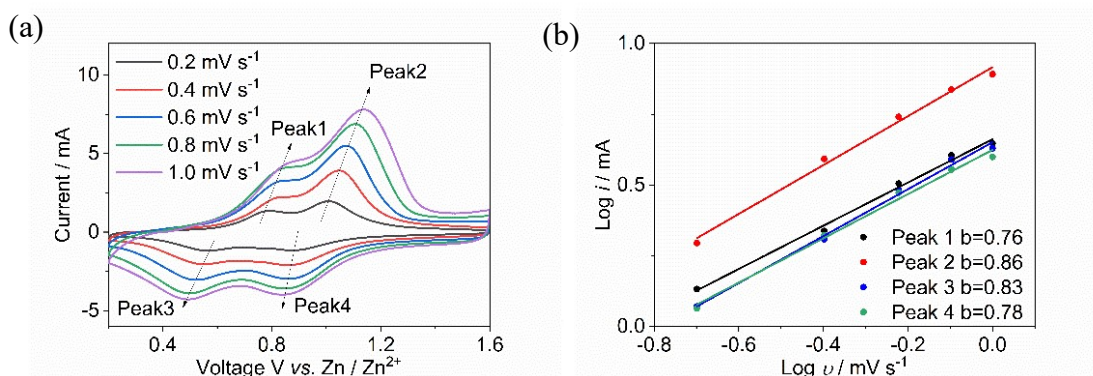

Fig. S7 (a) CV curves at different scan rates under 0%-PEG electrolyte. (b)  $\text{Log}(i)$  vs.  $\text{log}(v)$  plot of four peaks in CV curves in the 0%-PEG electrolyte.

Table S1 The proton conductivity performance of common proton-conducting materials.

| Compounds                                                      | Proton Conductivity<br>( $S \cdot cm^{-1}$ ) | Temperature /<br>humidity | Ref.      |
|----------------------------------------------------------------|----------------------------------------------|---------------------------|-----------|
| $\{[Zn-(C_{10}H_2O_8)_{0.5}(C_{10}S_2N_2H_8)] \cdot 2H_2O\}_n$ | $4.39 \times 10^{-4}$                        | 353 K /<br>98% RH         | 1         |
| $(C_6N_4H_{22})_{0.5}[Zn(HPO_4)_2]$                            | $4.60 \times 10^{-4}$                        | 333 K /<br>98% RH         | 2         |
| $Ni(HEDPH_3)_2(2,2'-Bipy) \cdot H_2O$                          | $2.50 \times 10^{-3}$                        | 363 K /<br>98% RH         | 3         |
| PILP-OTF@MIL-101                                               | $7.61 \times 10^{-3}$                        | 358 K /<br>98% RH         | 4         |
| $(C_2N_2H_{10})_{0.5}CoPO_4$                                   | $2.05 \times 10^{-3}$                        | 329 K /<br>98% RH         | 5         |
| $(CH_3NH_3)_2Ag_4Sn_3S_8$                                      | $1.14 \times 10^{-3}$                        | 340 K /<br>99% RH         | 6         |
| MOF-801                                                        | $1.88 \times 10^{-3}$                        | 298 K /<br>98% RH         | 7         |
| <b><math>C_4N_2-VO</math></b>                                  | $1.18 \times 10^{-3}$                        | 358 K /<br>98% RH         | This work |

Table S2 The proton conductivity performance of water-assisted vanadium-based proton conductors.

| Compounds                                                                                                                                                                                                      | $\sigma_{proton}$<br>(S·cm <sup>-1</sup> ) | Temperature /<br>Humidity | Ref.      |
|----------------------------------------------------------------------------------------------------------------------------------------------------------------------------------------------------------------|--------------------------------------------|---------------------------|-----------|
| (C <sub>6</sub> H <sub>14</sub> N <sub>2</sub> )[(VO)P <sub>2</sub> O <sub>7</sub> ]                                                                                                                           | $3.30 \times 10^{-4}$                      | 323 K /<br>100% RH        | 8         |
| V <sub>2</sub> O <sub>2</sub> (HPO <sub>4</sub> )(HPO <sub>3</sub> )(C <sub>2</sub> O <sub>4</sub> ) <sub>2</sub> ·(C <sub>4</sub> N <sub>2</sub> H <sub>12</sub> ) <sub>2</sub> ·2H <sub>2</sub> O            | $4.35 \times 10^{-4}$                      | 348 K /<br>98% RH         | 9         |
| Na <sub>4</sub> [V <sub>12</sub> B <sub>18</sub> O <sub>54</sub> (OH) <sub>6</sub> (H <sub>2</sub> O)]·(H <sub>2</sub> en) <sub>4</sub> ·2(OH)·3H <sub>2</sub> O                                               | $2.55 \times 10^{-4}$                      | 333 K /<br>100% RH        | 10        |
| [Ni(en) <sub>3</sub> ] <sub>3</sub> ·[1,3-dap] <sub>2</sub> ·H <sub>6</sub> [V <sub>10</sub> B <sub>26</sub> O <sub>60</sub> (OH) <sub>10</sub> ]                                                              | $1.78 \times 10^{-3}$                      | 323 K /<br>100% RH        | 11        |
| K <sub>2</sub> [(VO) <sub>2</sub> (HPO <sub>4</sub> ) <sub>2</sub> (C <sub>2</sub> O <sub>4</sub> )]                                                                                                           | $1.15 \times 10^{-2}$                      | 313 K /<br>95% RH         | 12        |
| [Cd(en) <sub>2</sub> ] <sub>2</sub> [(V <sup>IV</sup> O) <sub>10</sub> (V <sup>V</sup> O) <sub>2</sub> B <sub>32</sub> O <sub>66</sub> (OH) <sub>18</sub> (H <sub>2</sub> O) <sub>8</sub> ]·14H <sub>2</sub> O | $9.52 \times 10^{-4}$                      | 358 K /<br>98% RH         | 13        |
| <b>C<sub>4</sub>N<sub>2</sub>-VO</b>                                                                                                                                                                           | $1.18 \times 10^{-3}$                      | 358 K /<br>98% RH         | This work |

Table S3 Comparison of the electrochemical performance of vanadium oxide–based cathode materials for AZIBs.

| Compounds                                                             | Specific capacity (mAh g <sup>-1</sup> ) | Operating conditions (V) | Capacity retention (loss / cycle)    | Electrolyte                                    | Ref.         |
|-----------------------------------------------------------------------|------------------------------------------|--------------------------|--------------------------------------|------------------------------------------------|--------------|
| MnVO                                                                  | 415.0<br>(0.05 A g <sup>-1</sup> )       | 0.2 – 1.6                | 8% / 2000<br>(4 A g <sup>-1</sup> )  | 3 M<br>Zn(OTf) <sub>2</sub>                    | 14           |
| NH <sub>4</sub> V <sub>4</sub> O <sub>10</sub>                        | 423.8<br>(0.1 A g <sup>-1</sup> )        | 0.5 – 1.7                | 13% / 2000<br>(2 A g <sup>-1</sup> ) | 3 M<br>Zn(OTf) <sub>2</sub>                    | 15           |
| Ba <sub>0.23</sub> V <sub>2</sub> O <sub>5</sub> ·1.1H <sub>2</sub> O | 378<br>(0.1 A g <sup>-1</sup> )          | 0.3 – 1.6                | 7% / 2000<br>(5 A g <sup>-1</sup> )  | 3 M<br>Zn(OTf) <sub>2</sub>                    | 16           |
| Na <sub>2</sub> V <sub>6</sub> O <sub>16</sub> ·1.63H <sub>2</sub> O  | 352.0<br>(0.05 A g <sup>-1</sup> )       | 0.2 – 1.6                | 10% / 6000<br>(5 A g <sup>-1</sup> ) | 3 M<br>Zn(OTf) <sub>2</sub>                    | 17           |
| V <sub>2</sub> O <sub>5</sub>                                         | 187.7<br>(1 A g <sup>-1</sup> )          | 0.4 – 1.4                | 11% / 180<br>(1 A g <sup>-1</sup> )  | 1 M ZnSO <sub>4</sub><br>with 20%<br>PEG       | 18           |
| Na <sub>0.33</sub> V <sub>2</sub> O <sub>5</sub>                      | 367.1<br>(0.1 A g <sup>-1</sup> )        | 0.2 – 1.6                | 7% / 1000<br>(1 A g <sup>-1</sup> )  | 3 M<br>Zn(OTf) <sub>2</sub>                    | 19           |
| (NH <sub>4</sub> ) <sub>2</sub> V <sub>4</sub> O <sub>9</sub>         | 376.0<br>(0.1 A g <sup>-1</sup> )        | 0.3 – 1.3                | 22% / 2000<br>(5 A g <sup>-1</sup> ) | 3 M<br>Zn(OTf) <sub>2</sub>                    | 20           |
| Ba <sub>1.2</sub> V <sub>6</sub> O <sub>16</sub> ·3H <sub>2</sub> O   | 345.5<br>(0.1 A g <sup>-1</sup> )        | 0.3 – 1.4                | 4% / 2000<br>(5 A g <sup>-1</sup> )  | 2 M ZnSO <sub>4</sub>                          | 21           |
| HNaV <sub>6</sub> O <sub>16</sub> ·4H <sub>2</sub> O                  | 444.0<br>(0.5 A g <sup>-1</sup> )        | 0.2 – 1.6                | 6% / 1000<br>(5 A g <sup>-1</sup> )  | 3 M<br>Zn(OTf) <sub>2</sub>                    | 22           |
| Ag <sub>2</sub> V <sub>4</sub> O <sub>11</sub>                        | 210.0<br>(0.2 A g <sup>-1</sup> )        | 0.4 – 1.7                | 7% / 6000<br>(5 A g <sup>-1</sup> )  | 3 M<br>Zn(OTf) <sub>2</sub>                    | 23           |
| <b>C<sub>4</sub>N<sub>2</sub>-VO</b>                                  | 382.4<br>(0.2 A g <sup>-1</sup> )        | 0.2 – 1.6                | 6% / 2000<br>(5 A g <sup>-1</sup> )  | 3 M<br>Zn(OTf) <sub>2</sub><br>with 20%<br>PEG | This<br>work |

## References

- 1 S. Sanda, S. Biswas and S. Konar, *Inorg. Chem.*, 2015, **54**, 1218–1222.
- 2 K. Zhang, M. Ji, X.Y. Zhou, F. Xuan, B. Duan, Y. Yuan, G. Liu, H. Duan and H. Zhao, *RSC Adv.*, 2023, **13**, 12703–12711.
- 3 I. Akhmetova, M. Rautenberg, C. Das, B. Bhattacharya and F. Emmerling, *ACS Omega*, 2023, **8**, 16687–16693.
- 4 S. Zhang, Y. Xie, R. J. Somerville, F. F. Tirani, R. Scopelliti, Z. Fei, D. Zhu and P. J. Dyson, *Small*, 2023, **19**, 2206999.
- 5 M. Wang, H.B. Luo, S.X. Liu, Y. Zou, Z.F. Tian, L. Li, J.L. Liu and X.M. Ren, *Dalton Trans.*, 2016, **45**, 19466–19472.
- 6 H.B. Luo, M. Wang, J. Zhang, Z.F. Tian, Y. Zou and X.M. Ren, *ACS Appl. Mater. Interfaces*, 2018, **10**, 2619–2627.
- 7 J. Zhang, H.J. Bai, Q. Ren, H.B. Luo, X.M. Ren, Z.F. Tian and S. Lu, *ACS Appl. Mater. Interfaces*, 2018, **10**, 28656–28663.
- 8 L. Zhang, C. Zhang, Y. Li, S. Xu, R. Liao, S. Zhang, S. Li and X. Liu, *Appl. Organomet. Chem.*, 2025, **39**, e70358.
- 9 Y. Yang, L. Huang, B. Li, S. Zhao, F. Zhang and Y. Bi, *Inorg. Chem. Commun.*, 2022, **141**, 109545.
- 10 X. Liu, B. Guo, L. Zhang, S. Zhao, Y. Dong and Z. Zhao, *New J. Chem.*, 2022, **46**, 16352–16358.
- 11 K. Bu, L. Zhang, F. Sun, D. Zeng, M. Jiang and H. Yuan, *Cryst. Growth Des.*, 2022, **22**, 1824–1830.
- 12 H.X. Sun, H.N. Wang, Y.H. Zou and X. Meng, *Inorg. Chem. Commun.*, 2021, **124**, 108322.
- 13 M.Z. Meng, B.L. Huang, S.S. Xu, Y.P. Chen and X.H. Huang, *Inorg. Chem.*, 2025,

64, 14287–14294.

14 C. Liu, Z. Neale, J. Zheng, X. Jia, J. Huang, M. Yan, M. Tian, M. Wang, J. Yang and G. Cao, *Energy Environ. Sci.*, 2019, **12**, 2273–2285.

15 K. Li, Y. Liu and X. Wu, *CrystEngComm*, 2022, **24**, 5421–5427.

16 X. Qin, Y. Du, P. Zhang, X. Wang, Q. Lu, A. Yang and J. Sun, *Int. J. Miner. Metall. Mater.*, 2021, **28**, 1684–1692.

17 P. Hu, T. Zhu, X. Wang, X. Wei, M. Yan, J. Li, W. Luo, W. Yang, W. Zhang, L. Zhou, Z. Zhou and L. Mai, *Nano Lett.*, 2018, **18**, 1758–1763.

18 X. Li, Y. Zhou, H. Tu, Z. Wang, R. Wu, Y. Lu, Y. Zong, Q. Liu, J. He, L. Qian, S. Song, Y. Zhang, C. Meng and A. Yuan, *J. Solid State Electrochem.*, 2024, **28**, 3209–3219.

19 P. He, G. Zhang, X. Liao, M. Yan, X. Xu, Q. An, J. Liu and L. Mai, *Adv. Energy Mater.*, 2018, **8**, 1702463.

20 Y. Zhang, H. Jiang, L. Xu, Z. Gao and C. Meng, *ACS Appl. Energy Mater.*, 2019, **2**, 7861–7869.

21 X. Wang, B. Xi, X. Ma, Z. Feng, Y. Jia, J. Feng, Y. Qian and S. Xiong, *Nano Lett.*, 2020, **20**, 2899–2906.

22 C. Guan, F. Hu, X. Yu, H. Chen, G. Song and K. Zhu, *Rare Met.*, 2022, **41**, 448–456.

23 Q. Li, Y. Liu, K. Ma, G. Yang and C. Wang, *Small Methods*, 2019, **3**, 1900637.
